# Supplementary material for: Highly stable perovskite nanogels as inks for multicolor luminescent authentication applications
Source: Royal Society of Chemistry journal article supplement (doi:10.1039/c8tc04420a), 2018-01-01
Supplement: c8tc04420a1.pdf [file c8tc04420a1.pdf]

## **Electronic Supplementary Information**

### **Highly Stable Perovskite Nanogels as Inks for Multicolor Luminescent Authentication Applications**

*Hui Wang, Xiong Yin\* and Leyu Wang\**

State Key Laboratory of Chemical Resource Engineering, Beijing University of  
Chemical Technology, Beijing 100029, China

\*E-mail: [yinxiong@mail.buct.edu.cn](mailto:yinxiong@mail.buct.edu.cn) ; [lywang@mail.buct.edu.cn](mailto:lywang@mail.buct.edu.cn)

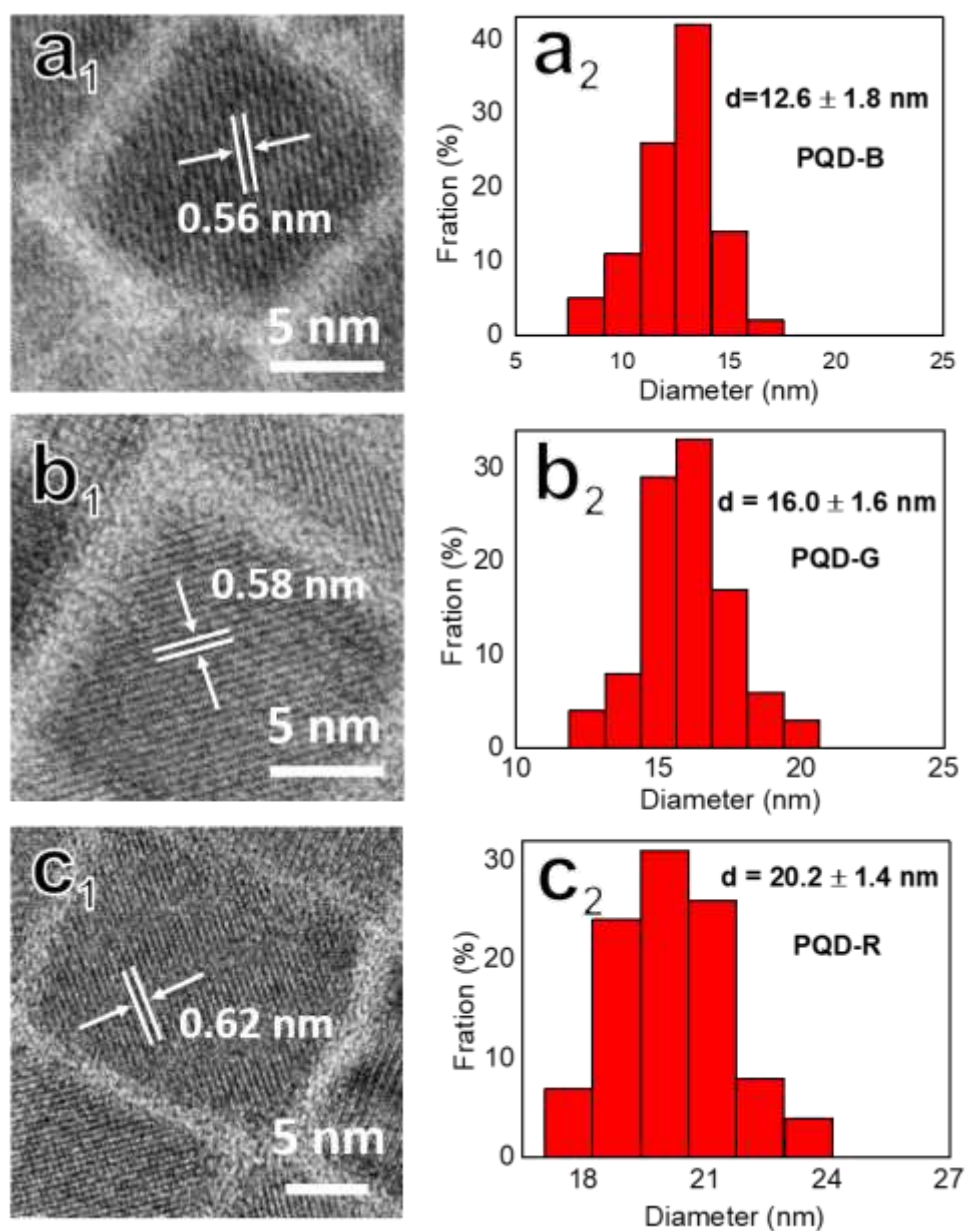

**Figure S1.** The HRTEM images ( $a_1$ ,  $b_1$ ,  $c_1$ ) and their size distribution ( $a_2$ ,  $b_2$ ,  $c_2$ ) of PQD-B, PQD-G and PQD-R, respectively.

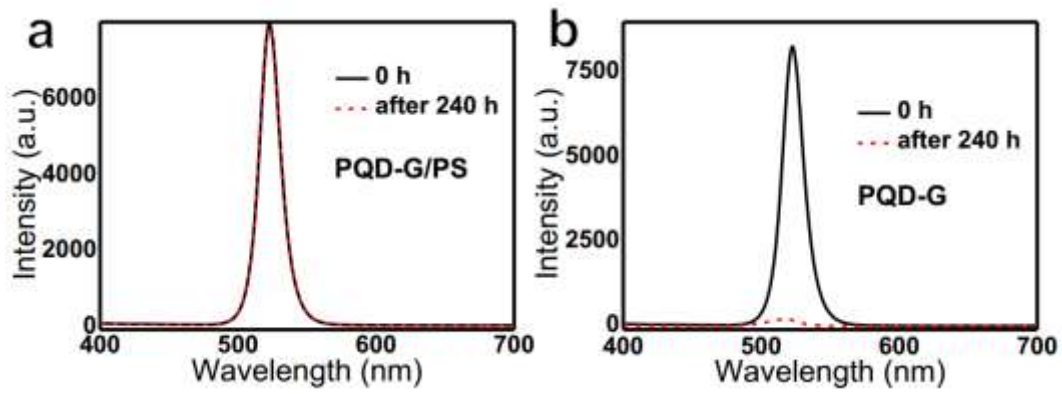

**Figure S2.** The luminescence spectra of PQD-G/PS (a) and PQD-G (b) before and after irradiation (365-nm light) for 240 h.

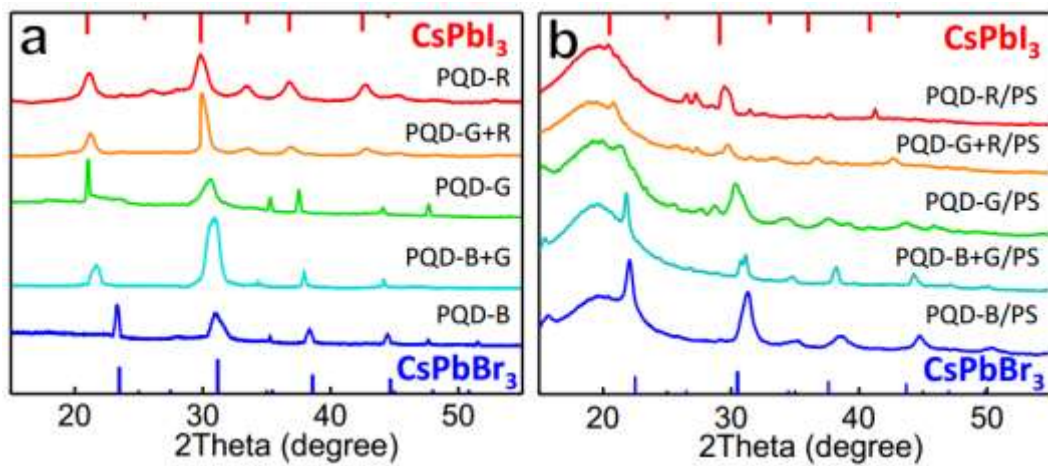

**Figure S3.** XRD patterns of PQDs with their mixture (a) and PQDs/PS films with their mixture films (b). The wide weak peak around  $20^\circ$  can be ascribed to the PS film.

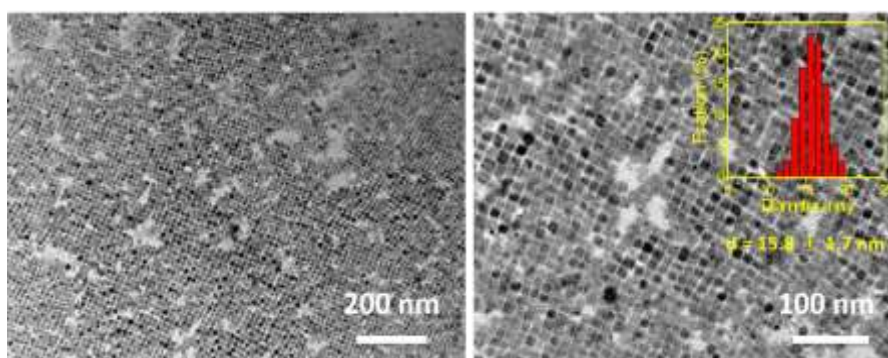

**Figure S4.** TEM images of CsPbBr<sub>3</sub> QDs dispersed in as-polymerized PS.

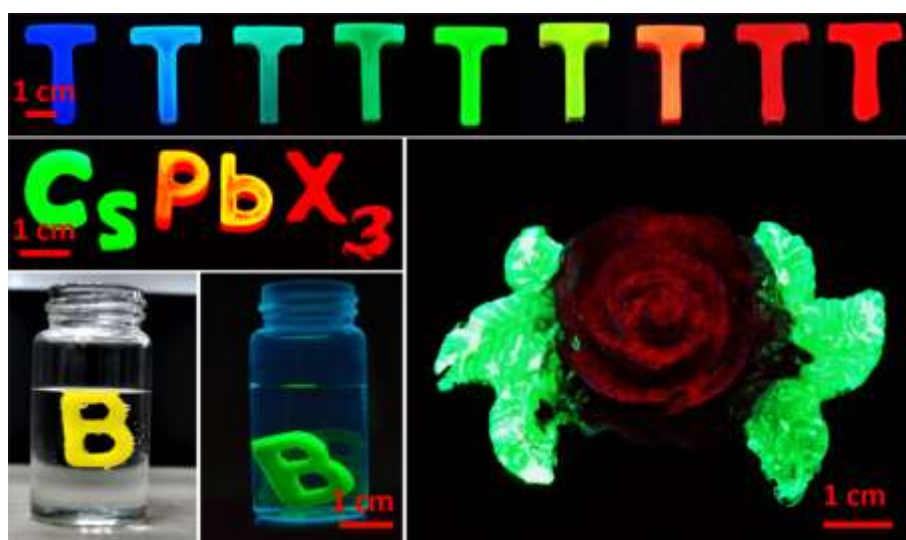

**Figure S5.** Fluorescent letters and flower modeled with different PQD/PS ( $\lambda_{ex} = 365$  nm).
